# Supplementary material
Source: publisher figshare collection journal article supplement (https://gsajournals.figshare.com/ndownloader/files/20398674)
Supplement: Supplementary file 1 [file 20398674]

## Sheet: SleepDataNov13
ID	SEX	GENOTYPE	Treatment	Data Confidence Level	Start Date	Start Time	Test Duration	Channel of Full Nov Merge	1	2	3	4	5	6	7	8	9	10	11	12	13	14	15	16	17	18	19	20	21	22	23	24	25	26	27	28	29	30	31	32	33	34	35	36	37	38	39	40	41
6220	F	Ob	TREATED	1	2014-03-21	34976	120.98	Ch 1	0.51	0.83	0.62	0.41	0.86	0.54	0.58	0.7	0.02	0.13	0.14	0.06	0.27	0.73	0.39	0.47	0.03	0.13	0.54	0.96	0.91	0.41	0.52	0.9	0.53	0.51	0.86	0.56	0.01	0.85	0.61	0.21	0.56	0.46	0.41	0.03	0.54	0.87	0.24	0.2	0.01
6221	F	Ob	TREATED	0.58	2014-03-21	34976	120.98	Ch 2	0.52	0.78	0.39	0.38	0.81	0.76	0.15	0.14	0.45	0.1	0.01	0.05	0.65	0.65	0.09	0.4	0.11	0.09	0.32	0.92	0.77	0.94	0.89	0.67	0.76	0.88	0.74	0.48	0.21	0.78	0.83	0.14	0.44	0.04	0.5	0.26	0.09	0.71	0.2	0.08	0.43
6222	F	Wt	TREATED	1	2014-03-21	34976	120.98	Ch 4	0.01	0.01	0.03	0.58	0.08	0.4	0.86	0.73	0.53	0.03	0.04	0.09	0.6	0.28	0.06	0.08	0.66	0.45	0.42	0.78	0.9	0.56	0.95	0.75	0.69	0.75	0.9	0.22	0.74	0.13	0.88	0.79	0.39	0.09	0.23	0.35	0.12	0	0.02	0.01	0.14
6223	F	Wt	TREATED	1	2014-03-21	34976	120.98	Ch 5	0.07	0.05	0.28	0.58	0.47	0.25	0.76	0.46	0.24	0	0.02	0.03	0.24	0.81	0.05	0.11	0.25	0.46	0.49	0.77	0.33	0.64	0.63	0.88	0.4	0.9	0.86	0.23	0.71	0.47	0.77	0.42	0.24	0.01	0.04	0.18	0.02	0.37	0.07	0.11	0.19
6224	F	Wt	TREATED	1	2014-03-21	34976	120.98	Ch 6	0.05	0.03	0.21	0.65	0.39	0.23	0.86	0.71	0.05	0.03	0.08	0.08	0.04	0.88	0.75	0.13	0.13	0.61	0.12	0.77	0.47	0.04	0.35	0.63	0.85	0.76	0.58	0.91	0.38	0.85	0.34	0.86	0.33	0.29	0.23	0.06	0.36	0.02	0.05	0.02	0.04
6225	F	Ob	TREATED	0.69	2014-03-21	34976	120.98	Ch 7	0.08	0.45	0.67	0.02	0.3	0.61	0.44	0.52	0.24	0.02	0.03	0.7	0.09	0.53	0.02	0.61	0.53	0.18	0.6	0.81	0.66	0.86	0.32	0.83	0.33	0.7	0.71	0.41	0.19	0.59	0.78	0.22	0.38	0.03	0.38	0.55	0.05	0.73	0.04	0.11	0.2
6226	F	Ob	TREATED	0.7	2014-03-21	34976	120.98	Ch 8	0.32	0.77	0.33	0.83	0.6	0.32	0.88	0.57	0.35	0.2	0.25	0.14	0.86	0.32	0.37	0.27	0.09	0.22	0.3	0.92	0.65	0.6	0.7	0.72	0.84	0.8	0.51	0.89	0.47	0.64	0.22	0.89	0.42	0.06	0.46	0.31	0.54	0.46	0.21	0.07	0.09
6227	F	Wt	TREATED	0.87	2014-03-21	34976	120.98	Ch 9	0.01	0.01	0.21	0.42	0.07	0.76	0.61	0.91	0.44	0.07	0.08	0.25	0.76	0.49	0.61	0.46	0.2	0.21	0.72	0.84	0.22	0.02	0.02	0.8	0.64	0.72	0.59	0.71	0.58	0.63	0.76	0.38	0.38	0.05	0.01	0.06	0.45	0.44	0.04	0.22	0.14
6228	F	Wt	TREATED	1	2014-03-21	34976	120.98	Ch 10	0.06	0.02	0.55	0.71	0.11	0.85	0.63	0.37	0.62	0.25	0.03	0.02	0.05	0.71	0.16	0.04	0.03	0.26	0.89	0.14	0.74	0.37	0.88	0.92	0.52	0.89	0.55	0.9	0.81	0.41	0.6	0.66	0.52	0.03	0.06	0.08	0.4	0.01	0.02	0	0.02
6229	F	Wt	TREATED	1	2014-03-21	34976	120.98	Ch 11	0.01	0.02	0.04	0.75	0.63	0.14	0.87	0.62	0.3	0.03	0.34	0.03	0.77	0.54	0.1	0.55	0.02	0.01	0.03	0.73	0.66	0.52	0.37	0.66	0.71	0.76	0.44	0.87	0.25	0.73	0.65	0.45	0.27	0.01	0.02	0.01	0.54	0.38	0.04	0.02	0.04
6230	M	Wt	TREATED	1	2014-03-21	34976	120.98	Ch 12	0.03	0.11	0.3	0.7	0.78	0.58	0.18	0.63	0.3	0.05	0.19	0.17	0.12	0.69	0.85	0.21	0.21	0.59	0.63	0.65	0.85	0.37	0.46	0.85	0.55	0.53	0.65	0.42	0.81	0.37	0.69	0.28	0.31	0.07	0.05	0.09	0.88	0.1	0.48	0.03	0.25
6231	M	Ob	TREATED	1	2014-03-21	34976	120.98	Ch 13	0.28	0.2	0.57	0.86	0.58	0.04	0.03	0.4	0.59	0.29	0.42	0.08	0.07	0.05	0.84	0.95	0.1	0.21	0.96	0.95	0.91	0.96	0.88	0.92	0.58	0.12	0.81	0.89	0.89	0.41	0.07	0.1	0.88	0.48	0.03	0.01	0.02	0.43	0.9	0.86	0.2
6232	M	Wt	TREATED	1	2014-03-21	34976	120.98	Ch 14	0.02	0.28	0.6	0.56	0.6	0.44	0.72	0.53	0.14	0.02	0.26	0.07	0.37	0.27	0.02	0.4	0.21	0.01	0.05	0.66	0.42	0.36	0.78	0.79	0.49	0.78	0.79	0.61	0.59	0.46	0.45	0.58	0.18	0.27	0.34	0.04	0.39	0.12	0.49	0.02	0.01
6233	M	Wt	TREATED	1	2014-03-21	34976	120.98	Ch 15	0.03	0.76	0.66	0.75	0.73	0.58	0.63	0.77	0.19	0.01	0.01	0.03	0.03	0.03	0.71	0.93	0.12	0.6	0.95	0.62	0.75	0.78	0.97	0.74	0.82	0.72	0.56	0.77	0.52	0.61	0.39	0.32	0.26	0.06	0.01	0.01	0.05	0.06	0.91	0.33	0.72
6236	M	Ob	TREATED	1	2014-03-21	34976	120.98	Ch 16	0.28	0.74	0.53	0.18	0.76	0.25	0.56	0.41	0.26	0.11	0.22	0.48	0.23	0.06	0.35	0.86	0.09	0.04	0.64	0.35	0.24	0.62	0.76	0.7	0.82	0.89	0.46	0.75	0.94	0.1	0.57	0.85	0.36	0.15	0.32	0.06	0.79	0.11	0.5	0.04	0.11
6237	M	Ob	TREATED	1	2014-03-21	34976	120.98	Ch 17	0.33	0.54	0.23	0.84	0.52	0.67	0.35	0.68	0.33	0.43	0.33	0.07	0.56	0.05	0.69	0.36	0.12	0.82	0.06	0.3	0.72	0.59	0.63	0.55	0.88	0.37	0.75	0.88	0.6	0.28	0.81	0.28	0.39	0.44	0.27	0.04	0.33	0.73	0.1	0.21	0.83
6238	M	Wt	TREATED	1	2014-03-21	34976	120.98	Ch 18	0.04	0.09	0.63	0.78	0.66	0.92	0.52	0.75	0.34	0.1	0.14	0.18	0.42	0.82	0.32	0.13	0.26	0.27	0.88	0.41	0.38	0.03	0.27	0.65	0.83	0.7	0.55	0.79	0.48	0.58	0.81	0.41	0.24	0.3	0.04	0.2	0.67	0.09	0.07	0.12	0.28
6239	M	Wt	TREATED	0.96	2014-03-21	34976	120.98	Ch 19	0.03	0.04	0.09	0.64	0.47	0.7	0.27	0.83	0.11	0.06	0.13	0.4	0.18	0.42	0.34	0.04	0.07	0.32	0.33	0.58	0.6	0.39	0.09	0.88	0.6	0.84	0.79	0.1	0.74	0.69	0.33	0.75	0.07	0.34	0.06	0.03	0.04	0.46	0.02	0.03	0.02
6240	M	Ob	TREATED	0.67	2014-03-21	34976	120.98	Ch 20	0.03	0.05	0.03	0.06	0.08	0.68	0.47	0.54	0.59	0.7	0.52	0.63	0.93	0.33	0.41	0.93	0.99	0.99	0.99	1	0.92	0.98	0.95	0.78	0.75	0.13	0.57	0.82	0.69	0.32	0.57	0.94	0.58	0.7	0.2	0.29	0.19	0.14	0.89	0.45	0.71
6241	M	Wt	TREATED	1	2014-03-21	34976	120.98	Ch 21	0.08	0.08	0.72	0.38	0.56	0.53	0.39	0.78	0.03	0.56	0.07	0.1	0.04	0.4	0.93	0.3	0.01	0.21	0.91	0.48	0.91	0.6	0.89	0.92	0.91	0.16	0.33	0.89	0.84	0.52	0.04	0.59	0.41	0	0.09	0.01	0.75	0.87	0.27	0.07	0.24
6242	F	Ob	TREATED	1	2014-03-21	34976	120.98	Ch 23	0.39	0.66	0.38	0.69	0.7	0.41	0.59	0.5	0.36	0.17	0.09	0.36	0.56	0.13	0.42	0.15	0.12	0.73	0.57	0.52	0.5	0.44	0.73	0.85	0.54	0.85	0.55	0.49	0.8	0.47	0.3	0.63	0.29	0.32	0.33	0.37	0.25	0.52	0.35	0.16	0.53
6243	F	Wt	TREATED	1	2014-03-21	34976	120.98	Ch 24	0.04	0.04	0.57	0.71	0.26	0.7	0.16	0.86	0.35	0.15	0.04	0.26	0.35	0.07	0.1	0.07	0.33	0.26	0.63	0.74	0.67	0.56	0.76	0.9	0.71	0.59	0.89	0.38	0.9	0.38	0.73	0.45	0.42	0.2	0.33	0.16	0.2	0.06	0.1	0.03	0.3
6244	F	Wt	TREATED	1	2014-03-21	34976	120.98	Ch 25	0.01	0.02	0.09	0.68	0.85	0.58	0.44	0.77	0.06	0.06	0.05	0.05	0.06	0.24	0.26	0.78	0.56	0.15	0.3	0.89	0.58	0.95	0.6	0.8	0.75	0.89	0.42	0.89	0.66	0.89	0.25	0.54	0.15	0.02	0.02	0.03	0.05	0.1	0.06	0.05	0.02
6245	F	Wt	TREATED	1	2014-03-21	34976	120.98	Ch 26	0.04	0.03	0.05	0.52	0.87	0.84	0.66	0.7	0.26	0.04	0	0.23	0.22	0.41	0.1	0.1	0.05	0.04	0.48	0.94	0.9	0.98	0.79	0.99	0.95	0.48	0.91	0.88	0.91	0.57	0.94	0.7	0.29	0.02	0.01	0.01	0.02	0.01	0.01	0.01	0.01
6246	F	Ob	TREATED	0.84	2014-03-21	34976	120.98	Ch 27	0.02	0.65	0.64	0.63	0.56	0.46	0.6	0.26	0.59	0.04	0.21	0.05	0.09	0.2	0.76	0.63	0.24	0.24	0.63	0.84	0.25	0.71	0.84	0.7	0.65	0.8	0.59	0.77	0.72	0.42	0.52	0.47	0.18	0.07	0.11	0.09	0.16	0.05	0.11	0.56	0.01
6247	F	Wt	TREATED	1	2014-03-21	34976	120.98	Ch 28	0.01	0.03	0.05	0.64	0.82	0.55	0.75	0.94	0.14	0.06	0.51	0.39	0.06	0.07	0.02	0.66	0.4	0.05	0.44	0.43	0.06	0.3	0.81	0.98	0.52	0.87	0.84	0.51	0.59	0.62	0.54	0.61	0.19	0.01	0.27	0.25	0.32	0.1	0.61	0.23	0.48
6248	F	Wt	TREATED	0.94	2014-03-21	34976	120.98	Ch 29	0	0.01	0.02	0.2	0.65	0.94	0.68	0.31	0.41	0.06	0.21	0.27	0.77	0.24	0.4	0.87	0.82	0.32	0.14	0.56	0.67	0.39	0.69	0.85	0.62	0.88	0.54	0.88	0.39	0.73	0.74	0.33	0.3	0.18	0.03	0.18	0.65	0.07	0.01	0	0
6249	F	Wt	TREATED	1	2014-03-21	34976	120.98	Ch 30	0.01	0	0.3	0.67	0.84	0.58	0.91	0.79	0.12	0.04	0.02	0.54	0.08	0.03	0.05	0.25	0.86	0.65	0.1	0.66	0.6	0.91	0.87	0.55	0.91	0.84	0.66	0.76	0.56	0.83	0.49	0.66	0.27	0.01	0.2	0.06	0.15	0.02	0.01	0.01	0.29
6268	F	Wt	TREATED	1	2014-03-21	34976	120.98	Ch 31	0.01	0	0.55	0.84	0.55	0.62	0.55	0.31	0.31	0.01	0.02	0.09	0.07	0.08	0.86	0.25	0.02	0.45	0.61	0.89	0.5	0.75	0.63	0.92	0.76	0.88	0.5	0.85	0.64	0.7	0.38	0.48	0.24	0.01	0.01	0.01	0.85	0.2	0.01	0	0
6268	F	Wt	TREATED	1	2014-03-21	34976	120.98	Ch 31	0.01	0	0.55	0.84	0.55	0.62	0.55	0.31	0.31	0.01	0.02	0.09	0.07	0.08	0.86	0.25	0.02	0.45	0.61	0.89	0.5	0.75	0.63	0.92	0.76	0.88	0.5	0.85	0.64	0.7	0.38	0.48	0.24	0.01	0.01	0.01	0.85	0.2	0.01	0	0
6251	M	Wt	TREATED	1	2014-03-21	34976	120.98	Ch 32	0.02	0.01	0.15	0.78	0.15	0.9	0.44	0.82	0.28	0.01	0.07	0.02	0.49	0.03	0.04	0.42	0.88	0.26	0.09	0.55	0.26	0.75	0.52	0.95	0.87	0.47	0.83	0.69	0.64	0.27	0.72	0.56	0.2	0.01	0.01	0	0	0.01	0.07	0.74	0.32
6252	M	Ob	TREATED	1	2014-03-21	34976	120.98	Ch 33	0.01	0.02	0.03	0.31	0.71	0.37	0.03	0.73	0.45	0.13	0.21	0.59	0.06	0.92	0.95	0.23	0.27	0.94	0.34	0.95	0.23	0.59	0.78	0.51	0.89	0.65	0.75	0.48	0.85	0.38	0.59	0.56	0.39	0.38	0.03	0.45	0.63	0.04	0.03	0.92	0.27
6253	M	Wt	TREATED	1	2014-03-21	34976	120.98	Ch 34	0.04	0.29	0.88	0.28	0.72	0.23	0.67	0.6	0.37	0.05	0.05	0.08	0.35	0.38	0.05	0.04	0.54	0.92	0.2	0.67	0.48	0.09	0.73	0.91	0.64	0.78	0.74	0.58	0.92	0.62	0.52	0.73	0.09	0.1	0.4	0.06	0.02	0.03	0.03	0.08	0.92
6254	M	Wt	TREATED	1	2014-03-21	34976	120.98	Ch 35	0.04	0.04	0.11	0.28	0.37	0.78	0.75	0.6	0.34	0.09	0.02	0.06	0.44	0.24	0.08	0.06	0.06	0.11	0.51	0.64	0.44	0.6	0.57	0.7	0.78	0.56	0.46	0.66	0.83	0.42	0.67	0.54	0.34	0.02	0.01	0.05	0.34	0.06	0.01	0.02	0.01
6255	M	Wt	TREATED	1	2014-03-21	34976	120.98	Ch 36	0	0.01	0.01	0.52	0.55	0.79	0.61	0.62	0.35	0.06	0.08	0.02	0.83	0.33	0.06	0.83	0.28	0.5	0.91	0.49	0.65	0.56	0.85	0.8	0.9	0.63	0.88	0.43	0.75	0.61	0.41	0.47	0.14	0.07	0.07	0.05	0.86	0.43	0.03	0.73	0.5
6256	M	Wt	TREATED	1	2014-03-21	34976	120.98	Ch 37	0.01	0.01	0	0.01	0.05	0.35	0.94	0.81	0.35	0.04	0.03	0.13	0.26	0.24	0.72	0.98	0.36	0.31	0.93	0.98	0.26	0.7	0.94	0.99	0.3	0.02	0.46	0.34	0.68	0.01	0.11	0.67	0.06	0	0	0	0.02	0.05	0	0	0
6257	M	Wt	TREATED	1	2014-03-21	34976	120.98	Ch 38	0	0.03	0.05	0.31	0.81	0.62	0.73	0.78	0.42	0.25	0.13	0.03	0.04	0.08	0.16	0.72	0.63	0.03	0.61	0.99	0.23	0.86	0.71	0.5	0.97	0.24	0.39	0.88	0.6	0.85	0.18	0.61	0.19	0	0.02	0.04	0.06	0.05	0.05	0.09	0.88
6209	F	Ob	TREATED	0.96	2014-03-28	36667	120.92	Ch 1	0.63	0.42	0.9	0.72	0.42	0.86	0.47	0.45	0.25	0.03	0.12	0.18	0.51	0.31	0.51	0.28	0.24	0.06	0.06	0.17	0.88	0.35	0.89	0.6	0.72	0.49	0.71	0.31	0.61	0.5	0.82	0.36	0.22	0.28	0.51	0.14	0.39	0.14	0.6	0.54	0.04
6210	F	Wt	TREATED	0.82	2014-03-28	36667	120.92	Ch 2	0.28	0.63	0.76	0.76	0.85	0.79	0.66	0.76	0.03	0.04	0.1	0.74	0.28	0.05	0.67	0.73	0.12	0.08	0.05	0.63	0.04	0.1	0.92	0.72	0.88	0.62	0.62	0.67	0.51	0.8	0.72	0.45	0.01	0.01	0.03	0.4	0.05	0.05	0.41	0.77	0.27
6211	F	Ob	TREATED	0.84	2014-03-28	36667	120.92	Ch 4	0.51	0.34	0.8	0.55	0.35	0.82	0.6	0.37	0.31	0.31	0.16	0.25	0.05	0.61	0.83	0.38	0.26	0.21	0.05	0.55	0.62	0.64	0.81	0.65	0.85	0.43	0.56	0.66	0.66	0.5	0.54	0.49	0.33	0.29	0.26	0.09	0.23	0.84	0.41	0.46	0.32
6212	F	Wt	TREATED	0.91	2014-03-28	36667	120.92	Ch 5	0.42	0.45	0.7	0.65	0.54	0.66	0.55	0.64	0.03	0.02	0.46	0.1	0.06	0.25	0.89	0.46	0.1	0.36	0.34	0.36	0.85	0.91	0.57	0.87	0.81	0.89	0.17	0.75	0.88	0.79	0.29	0.73	0.02	0.01	0.05	0.06	0.05	0.07	0.25	0.84	0.59
6213	M	Wt	TREATED	0.96	2014-03-28	36667	120.92	Ch 7	0.02	0.09	0.77	0.63	0.81	0.62	0.75	0.71	0.07	0.09	0.14	0.07	0.09	0.1	0.64	0.8	0.17	0.09	0.3	0.59	0.03	0.64	0.67	0.75	0.9	0.58	0.74	0.9	0.55	0.89	0.64	0.47	0.08	0.14	0.1	0.02	0.04	0.01	0.03	0.06	0.71
6214	M	Ob	TREATED	1	2014-03-28	36667	120.92	Ch 8	0.28	0.73	0.36	0.56	0.68	0.47	0.26	0.66	0.05	0.23	0.05	0.27	0.66	0.02	0.04	0.76	0.14	0.11	0.12	0.69	0.66	0.77	0.57	0.36	0.65	0.86	0.53	0.76	0.17	0.26	0.71	0.28	0.19	0.18	0.51	0.03	0.04	0.51	0.56	0.06	0.1
6216	M	Ob	TREATED	0.69	2014-03-28	36667	120.92	Ch 10	0.32	0.89	0.86	0.25	0.59	0.52	0.32	0.71	0.06	0.26	0.25	0.37	0.48	0.08	0.41	0.75	0.46	0.43	0.07	0.05	0.54	0.86	0.56	0.88	0.79	0.77	0.25	0.84	0.86	0.06	0.45	0.54	0.25	0.56	0.18	0.38	0.05	0.46	0.58	0.09	0.18
6217	M	Wt	TREATED	1	2014-03-28	36667	120.92	Ch 11	0.03	0.37	0.92	0.54	0.82	0.85	0.65	0.58	0.04	0.05	0.06	0.05	0.76	0.54	0.06	0.64	0.56	0.15	0.88	0.1	0.01	0.27	0.79	0.64	0.81	0.7	0.33	0.52	0.78	0.26	0.58	0.52	0.02	0.01	0.03	0.02	0.44	0.77	0.02	0.37	0.74
6218	M	Wt	TREATED	0.89	2014-03-28	36667	120.92	Ch 12	0.03	0.02	0.61	0.7	0.81	0.67	0.94	0.73	0.13	0.12	0.03	0.07	0.1	0.11	0.3	0.91	0.28	0.02	0.09	0.3	0.27	0.02	0.59	0.7	0.68	0.91	0.43	0.88	0.75	0.71	0.66	0.58	0.02	0.03	0.08	0.04	0.04	0.03	0.45	0.61	0.05
6219	M	Wt	TREATED	0.71	2014-03-28	36667	120.92	Ch 13	0.37	0.87	0.73	0.4	0.86	0.7	0.45	0.61	0.29	0.07	0.25	0.22	0.23	0.07	0.06	0.86	0.31	0.25	0.55	0.06	0.5	0.51	0.72	0.63	0.85	0.88	0.6	0.85	0.6	0.64	0.55	0.59	0.03	0.03	0.04	0.03	0.07	0.05	0.37	0.69	0.06
6235	F	Wt	TREATED	0.89	2014-03-28	36667	120.92	Ch 6	0.32	0.85	0.32	0.92	0.87	0.19	0.77	0.75	0.07	0.07	0.44	0.15	0.08	0.82	0.62	0.09	0.12	0.07	0.45	0.47	0.51	0.68	0.72	0.77	0.91	0.9	0.51	0.58	0.72	0.88	0.35	0.48	0.13	0.06	0.04	0.07	0.11	0.84	0.06	0.15	0.06
6258	F	Wt	TREATED	0.91	2014-03-28	36667	120.92	Ch 14	0.05	0.37	0.74	0.78	0.25	0.52	0.87	0.56	0.09	0.1	0.07	0.07	0.28	0.9	0.09	0.09	0.11	0.11	0.33	0.44	0.47	0.82	0.76	0.75	0.71	0.7	0.51	0.61	0.42	0.84	0.51	0.61	0.01	0.02	0.29	0.02	0.18	0.29	0.03	0.03	0.04
6259	F	Wt	TREATED	1	2014-03-28	36667	120.92	Ch 15	0.03	0.52	0.59	0.83	0.29	0.88	0.49	0.53	0.05	0.04	0.02	0.53	0.16	0.04	0.06	0.78	0.05	0.07	0.2	0.84	0.56	0.75	0.91	0.5	0.93	0.43	0.89	0.53	0.85	0.46	0.75	0.35	0.02	0.01	0.02	0.02	0.42	0.46	0.01	0.01	0.03
6260	F	Wt	TREATED	0.91	2014-03-28	36667	120.92	Ch 16	0.01	0.56	0.44	0.86	0.6	0.56	0.68	0.53	0.06	0.05	0.42	0.02	0.03	0.8	0.18	0.14	0.08	0.07	0.52	0.7	0.52	0.61	0.88	0.72	0.33	0.83	0.72	0.38	0.77	0.62	0.46	0.53	0.18	0.09	0	0	0.27	0.68	0.01	0.01	0.01
6261	F	Wt	TREATED	1	2014-03-28	36667	120.92	Ch 17	0.01	0.38	0.46	0.77	0.35	0.77	0.31	0.61	0.04	0.02	0.41	0.04	0.81	0.33	0.06	0.04	0.02	0.46	0.7	0.53	0.4	0.83	0.59	0.66	0.82	0.63	0.82	0.25	0.8	0.66	0.39	0.46	0.04	0.01	0.33	0.04	0.02	0.4	0.45	0.07	0.29
6262	F	Wt	TREATED	1	2014-03-28	36667	120.92	Ch 18	0	0.06	0.52	0.68	0.27	0.69	0.48	0.48	0	0	0.01	0.14	0.01	0.12	0.27	0	0	0.01	0.19	0.63	0.04	0.68	0.72	0.75	0.45	0.56	0.63	0.42	0.27	0.46	0.32	0.35	0	0	0	0	0.14	0	0	0	0
6263	M	Wt	TREATED	1	2014-03-28	36667	120.92	Ch 19	0.03	0.48	0.4	0.88	0.3	0.59	0.45	0.67	0.02	0.05	0.27	0.32	0.3	0.2	0.13	0.08	0.02	0.27	0.61	0.87	0.45	0.92	0.71	0.81	0.39	0.87	0.79	0.3	0.81	0.33	0.61	0.29	0.1	0.14	0.07	0.16	0.02	0.4	0.08	0.04	0.3
6264	M	Ob	TREATED	0.75	2014-03-28	36667	120.92	Ch 20	0.5	0.6	0.31	0.51	0.81	0.53	0.31	0.56	0.06	0.21	0.45	0.28	0.74	0.11	0.69	0.29	0.38	0.83	0.03	0.76	0.77	0.88	0.75	0.62	0.68	0.86	0.59	0.24	0.85	0.56	0.56	0.34	0.52	0.48	0.23	0.14	0.36	0.8	0.11	0.73	0.19
6265	F	Wt	TREATED	0.92	2014-03-28	36667	120.92	Ch 21	0.04	0.35	0.43	0.74	0.39	0.82	0.76	0.63	0.09	0.07	0.11	0.1	0.71	0.1	0.59	0.18	0.13	0.15	0.05	0.63	0.08	0.59	0.85	0.69	0.82	0.64	0.84	0.35	0.84	0.67	0.6	0.38	0.14	0.17	0.17	0.14	0.49	0.06	0.44	0.04	0.04
6266	F	Ob	TREATED	0.68	2014-03-28	36667	120.92	Ch 22	0.12	0.63	0.56	0.62	0.9	0.44	0.89	0.39	0.04	0.64	0.27	0.24	0.87	0.32	0.47	0.27	0.52	0.65	0.59	0.49	0.93	0.65	0.77	0.68	0.74	0.94	0.75	0.12	0.69	0.85	0.43	0.35	0.2	0.32	0.38	0.3	0.61	0.43	0.28	0.07	0.05
6267	F	Wt	TREATED	0.95	2014-03-28	36667	120.92	Ch 23	0.02	0.03	0.01	0.49	0.48	0.82	0.55	0.65	0.19	0.13	0.17	0.39	0.55	0.26	0.1	0.11	0.23	0.85	0.21	0.89	0.39	0.03	0.03	0.66	0.73	0.7	0.58	0.71	0.37	0.84	0.66	0.46	0.03	0.41	0.22	0.45	0.03	0.68	0.07	0.01	0.4
6268	F	Wt	TREATED	1	2014-03-21	34976	120.98	Ch 31	0.01	0	0.55	0.84	0.55	0.62	0.55	0.31	0.31	0.01	0.02	0.09	0.07	0.08	0.86	0.25	0.02	0.45	0.61	0.89	0.5	0.75	0.63	0.92	0.76	0.88	0.5	0.85	0.64	0.7	0.38	0.48	0.24	0.01	0.01	0.01	0.85	0.2	0.01	0	0
6268	F	Wt	TREATED	1	2014-03-21	34976	120.98	Ch 31	0.01	0	0.55	0.84	0.55	0.62	0.55	0.31	0.31	0.01	0.02	0.09	0.07	0.08	0.86	0.25	0.02	0.45	0.61	0.89	0.5	0.75	0.63	0.92	0.76	0.88	0.5	0.85	0.64	0.7	0.38	0.48	0.24	0.01	0.01	0.01	0.85	0.2	0.01	0	0
6277	F	Wt	TREATED	0.88	2014-03-28	36667	120.92	Ch 25	0.13	0.13	0.39	0.88	0.49	0.23	0.89	0.62	0.35	0.13	0.19	0.34	0.19	0.63	0.86	0.24	0.23	0.14	0.52	0.5	0.62	0.59	0.82	0.57	0.85	0.55	0.83	0.84	0.35	0.31	0.85	0.35	0.14	0.15	0.06	0.06	0.08	0.71	0.28	0.11	0.09
6278	F	Wt	TREATED	1	2014-03-28	36667	120.92	Ch 26	0.02	0.12	0.31	0.91	0.13	0.86	0.76	0.62	0.07	0.06	0.14	0.12	0.28	0.92	0.1	0.14	0.08	0.05	0.16	0.52	0.82	0.91	0.53	0.92	0.49	0.73	0.68	0.84	0.73	0.23	0.78	0.77	0.01	0.12	0.05	0.03	0.41	0.45	0.04	0.13	0.05
6279	F	Wt	TREATED	1	2014-03-28	36667	120.92	Ch 27	0.02	0.05	0.3	0.91	0.27	0.9	0.77	0.46	0.01	0.03	0.05	0.05	0.63	0.2	0.38	0.16	0.07	0.05	0.05	0.86	0.7	0.72	0.88	0.66	0.38	0.84	0.61	0.45	0.85	0.47	0.69	0.35	0.13	0.02	0.03	0.15	0.12	0.15	0.4	0.06	0.04
6280	M	Wt	TREATED	1	2014-03-28	36667	120.92	Ch 28	0.03	0.06	0.44	0.73	0.74	0.72	0.78	0.44	0.03	0.03	0.05	0.11	0.93	0.49	0.25	0.81	0.05	0.04	0.23	0.92	0.1	0.01	0.55	0.93	0.63	0.83	0.87	0.75	0.71	0.49	0.67	0.4	0.02	0.32	0	0.06	0.64	0.49	0.28	0.4	0
6281	M	Wt	TREATED	1	2014-03-28	36667	120.92	Ch 29	0.01	0.03	0.45	0.73	0.81	0.72	0.61	0.59	0.01	0.05	0.03	0.13	0.84	0.14	0.33	0.33	0.07	0.09	0.04	0.37	0.47	0.58	0.85	0.9	0.81	0.46	0.68	0.6	0.39	0.82	0.52	0.45	0.02	0.13	0.03	0.51	0.04	0.02	0.32	0.46	0.02
6282	M	Wt	TREATED	1	2014-03-28	36667	120.92	Ch 30	0.01	0.03	0.48	0.68	0.75	0.88	0.57	0.63	0.04	0.04	0.05	0.11	0.41	0.71	0.1	0.05	0.63	0.17	0.59	0.8	0.45	0.54	0.89	0.92	0.87	0.47	0.92	0.51	0.89	0.7	0.73	0.59	0.14	0.06	0.03	0.05	0.08	0.33	0.2	0.59	0.08
6283	M	Wt	TREATED	0.91	2014-03-28	36667	120.92	Ch 31	0.03	0.03	0.43	0.81	0.88	0.66	0.79	0.7	0.04	0.07	0.08	0.08	0.42	0.78	0.06	0.05	0.11	0.27	0.68	0.91	0.05	0.19	0.96	0.95	0.75	0.9	0.9	0.44	0.76	0.8	0.59	0.53	0.01	0.01	0	0.08	0.02	0.5	0.21	0.03	0.25
6697	M	Wt	CONTROL	1	2014-06-06	38160	120.48	Ch 30	0.01	0	0.02	0.05	0.8	0.13	0.85	0.61	0.01	0.01	0.04	0.06	0.19	0.87	0.56	0.12	0.77	0.32	0.83	0.5	0.83	0.69	0.74	0.55	0.8	0.71	0.78	0.86	0.32	0.71	0.7	0.31	0.01	0	0.01	0.01	0.25	0.6	0.26	0.63	0.19
6699	M	Wt	CONTROL	1	2014-06-06	38160	120.48	Ch 31	0.04	0.21	0.62	0.68	0.74	0.34	0.87	0.35	0.23	0.28	0.13	0.48	0.15	0.08	0.2	0.87	0.71	0.22	0.23	0.09	0.04	0.61	0.81	0.66	0.86	0.49	0.86	0.56	0.63	0.9	0.16	0.42	0.13	0.35	0.15	0.14	0.12	0.1	0.47	0.83	0.58
6701	M	Wt	CONTROL	1	2014-06-06	38160	120.48	Ch 32	0.04	0.21	0.73	0.53	0.94	0.59	0.62	0.45	0.06	0.03	0.12	0.05	0.08	0.04	0.89	0.37	0.06	0.05	0.34	0.76	0.84	0.36	0.91	0.59	0.92	0.68	0.73	0.88	0.64	0.61	0.72	0.21	0.02	0.18	0.07	0.04	0.05	0.61	0.17	0.08	0.05
6702	M	Wt	CONTROL	1	2014-06-06	38160	120.48	Ch 33	0	0.02	0.66	0.74	0.89	0.65	0.68	0.65	0.01	0.04	0.02	0.06	0.15	0.93	0.17	0.02	0.42	0.57	0.01	0.18	0.92	0.56	0.64	0.9	0.59	0.81	0.94	0.6	0.63	0.83	0.65	0.28	0.01	0.01	0.02	0.02	0.02	0.03	0.8	0.11	0.02
6703	M	Wt	CONTROL	1	2014-06-06	38160	120.48	Ch 34	0.01	0.03	0.04	0.83	0.63	0.85	0.53	0.52	0.04	0.1	0.07	0.08	0.04	0.09	0.78	0.91	0.24	0.11	0.69	0.58	0.95	0.88	0.7	0.05	0.85	0.9	0.59	0.9	0.53	0.78	0.44	0.36	0.04	0.05	0.14	0.32	0.05	0.02	0.39	0.88	0.36
6581	F	Wt	CONTROL	1	2014-06-06	38160	120.48	Ch 25	0	0.18	0.53	0.87	0.29	0.77	0.86	0.15	0.24	0.02	0.03	0.2	0.41	0.04	0.47	0.06	0.35	0.44	0.2	0.61	0.85	0.74	0.83	0.91	0.55	0.64	0.82	0.34	0.77	0.3	0.61	0.37	0.04	0.27	0.01	0.4	0.1	0.08	0.47	0.1	0.03
6582	F	Wt	CONTROL	1	2014-06-06	38160	120.48	Ch 26	0	0.01	0.05	0.67	0.34	0.82	0.48	0.65	0.03	0.11	0.15	0.05	0.65	0.87	0.21	0.08	0.13	0.49	0.38	0.43	0.86	0.68	0.91	0.44	0.8	0.59	0.69	0.54	0.33	0.79	0.62	0.27	0.02	0.01	0	0.42	0.47	0.21	0.5	0.03	0.01
6583	F	Wt	CONTROL	1	2014-06-06	38160	120.48	Ch 27	0.04	0.15	0.52	0.74	0.35	0.84	0.63	0.41	0.06	0.05	0.08	0.08	0.58	0.36	0.14	0.08	0.82	0.44	0.58	0.36	0.88	0.63	0.55	0.94	0.76	0.61	0.88	0.58	0.86	0.48	0.86	0.09	0.03	0.02	0.03	0.05	0.02	0.42	0.32	0.4	0.42
6584	M	Ob	CONTROL	1	2014-06-06	38160	120.48	Ch 28	0.06	0.19	0.87	0.86	0.37	0.63	0.62	0.36	0.07	0.08	0.1	0.08	0.1	0.82	0.17	0.08	0.09	0.71	0.84	0.92	0.42	0.37	0.91	0.9	0.53	0.89	0.73	0.15	0.49	0.88	0.29	0.37	0.19	0.14	0.12	0.06	0.08	0.1	0.33	0.81	0.41
6585	M	Wt	CONTROL	0.91	2014-06-06	38160	120.48	Ch 29	0	0.01	0.23	0.91	0.45	0.77	0.54	0.45	0.05	0.02	0.41	0.29	0.02	0.03	0.65	0.26	0.24	0.42	0.51	0.13	0.05	0.65	0.74	0.71	0.87	0.81	0.28	0.65	0.68	0.8	0.24	0.31	0	0.01	0.01	0.03	0.01	0.33	0.77	0.06	0.23
6728	F	Wt	TREATED	1	2014-06-06	38160	120.48	Ch 17	0.04	0.15	0.12	0.5	0.92	0.33	0.9	0.75	0.06	0.1	0.18	0.09	0.06	0.49	0.68	0.22	0.18	0.16	0.23	0.88	0.96	0.43	0.84	0.91	0.18	0.89	0.68	0.91	0.24	0.92	0.85	0.26	0.04	0.04	0.09	0.02	0.06	0.44	0.25	0.08	0.09
6729	F	Wt	TREATED	1	2014-06-06	38160	120.48	Ch 18	0.07	0.13	0.82	0.8	0.24	0.26	0.9	0.56	0.11	0.43	0.1	0.37	0.28	0.48	0.53	0.14	0.11	0.13	0.7	0.34	0.74	0.89	0.45	0.95	0.84	0.95	0.9	0.77	0.83	0.37	0.87	0.11	0.06	0.16	0.41	0.19	0.4	0.08	0.11	0.04	0.09
6730	F	Wt	TREATED	1	2014-06-06	38160	120.48	Ch 19	0.07	0.07	0.17	0.72	0.2	0.69	0.81	0.55	0.07	0.21	0.33	0.08	0.25	0.78	0.34	0.3	0.09	0.54	0.71	0.55	0.95	0.4	0.73	0.94	0.33	0.91	0.9	0.74	0.4	0.92	0.76	0.49	0.05	0.17	0.14	0.14	0.65	0.06	0.04	0.05	0.39
6731	F	Wt	TREATED	1	2014-06-06	38160	120.48	Ch 20	0	0.02	0.67	0.77	0.32	0.82	0.65	0.02	0.14	0.26	0.32	0.13	0.42	0.85	0.25	0.05	0.4	0.52	0.08	0.38	0.04	0.84	0.73	0.76	0.67	0.62	0.64	0.76	0.66	0.48	0.48	0.39	0.01	0.1	0.09	0	0.69	0.12	0.55	0.03	0.05
6732	F	Ob	TREATED	1	2014-06-06	38160	120.48	Ch 21	0.1	0.83	0.03	0.56	0.4	0.78	0.43	0.4	0.05	0.04	0.12	0.36	0.92	0.62	0.05	0.59	0.07	0.1	0.88	0.84	0.84	0.7	0.53	0.72	0.78	0.11	0.51	0.73	0.64	0.13	0.75	0.2	0.25	0.26	0.03	0.24	0.9	0.6	0.02	0.04	0.7
6733	M	Wt	TREATED	1	2014-06-06	38160	120.48	Ch 22	0.03	0.4	0.77	0.93	0.8	0.73	0.95	0.55	0.15	0.2	0.26	0.09	0.83	0.19	0.13	0.15	0.21	0.35	0.88	0.47	0.97	0.96	0.6	0.86	0.96	0.71	0.91	0.92	0.73	0.52	0.64	0.49	0.07	0.12	0.1	0.08	0.65	0.35	0.17	0.13	0.11
6734	M	Ob	TREATED	1	2014-06-06	38160	120.48	Ch 23	0.01	0.68	0.77	0.15	0.77	0.52	0.36	0.34	0.02	0.02	0.02	0.03	0.89	0.29	0.07	0.04	0.03	0.35	0.85	0.88	0.87	0.82	0.71	0.46	0.32	0.83	0.82	0.14	0.45	0.79	0.15	0.41	0.01	0.03	0.21	0.74	0.02	0.02	0.01	0.01	0.66
6735	M	Ob	TREATED	1	2014-06-06	38160	120.48	Ch 24	0.01	0.18	0.86	0.13	0.62	0.39	0.65	0.4	0.02	0.05	0.07	0.59	0.68	0.05	0.13	0.39	0.74	0.29	0.78	0.82	0.77	0.56	0.75	0.06	0.75	0.82	0.47	0.02	0.69	0.71	0.33	0.3	0.06	0.04	0.47	0.52	0.02	0.02	0.58	0.75	0.04
6678	F	Ob	TREATED	1	2014-06-06	38160	120.48	Ch 13	0.1	0.47	0.7	0.52	0.2	0.49	0.82	0.36	0.06	0.46	0.17	0.34	0.34	0.81	0.11	0.22	0.89	0.93	0.75	0.69	0.92	0.91	0.86	0.44	0.68	0.59	0.71	0.51	0.46	0.55	0.43	0.53	0.29	0.05	0.6	0.13	0.01	0.31	0.85	0.18	0.08
6679	F	Wt	TREATED	0.98	2014-06-06	38160	120.48	Ch 14	0.04	0.05	0.22	0.56	0.93	0.79	0.52	0.63	0.13	0.08	0.13	0.11	0.1	0.74	0.82	0.14	0.25	0.62	0.88	0.62	0.2	0.71	0.94	0.84	0.89	0.74	0.42	0.92	0.79	0.28	0.77	0.12	0.03	0.28	0.64	0.02	0.11	0.02	0.04	0.02	0.61
6680	M	Wt	TREATED	1	2014-06-06	38160	120.48	Ch 4	0.02	0.07	0.84	0.56	0.82	0.08	0.55	0.42	0.08	0.06	0.05	0.09	0.59	0.71	0.18	0.02	0.04	0.02	0.8	0.62	0.81	0.13	0.65	0.86	0.53	0.85	0.67	0.87	0.28	0.71	0.65	0.2	0.01	0.04	0.06	0.05	0.04	0.02	0.04	0.66	0.46
6681	M	Wt	TREATED	1	2014-06-06	38160	120.48	Ch 5	0.02	0.04	0.49	0.82	0.11	0.55	0.82	0.54	0.07	0.04	0.07	0.32	0.91	0.18	0.08	0.15	0.17	0.79	0.37	0.91	0.93	0.59	0.93	0.63	0.91	0.29	0.83	0.93	0.23	0.05	0.61	0.32	0.02	0.08	0.06	0.39	0.48	0.07	0.05	0.01	0.07
6682	M	Wt	TREATED	1	2014-06-06	38160	120.48	Ch 6	0.01	0.01	0.19	0.72	0.84	0.51	0.94	0.33	0.22	0.02	0.03	0.06	0.7	0.86	0.25	0.62	0.26	0.08	0.74	0.69	0.87	0.78	0.47	0.78	0.88	0.42	0.83	0.62	0.64	0.21	0.72	0.24	0.01	0.01	0.02	0.01	0.01	0.03	0.03	0.03	0.54
6683	M	Wt	TREATED	0.99	2014-06-06	38160	120.48	Ch 7	0.05	0.35	0.72	0.78	0.48	0.34	0.74	0.27	0	0.02	0.02	0.21	0.59	0.1	0.02	0.59	0.47	0.52	0.76	0.81	0.46	0.82	0.82	0.8	0.67	0.87	0.49	0.85	0.3	0.13	0.42	0.39	0.01	0.02	0.01	0.02	0.06	0.04	0.23	0.2	0.03
6684	M	Wt	TREATED	1	2014-06-06	38160	120.48	Ch 8	0.04	0.25	0.64	0.4	0.89	0.31	0.7	0.53	0.08	0.11	0.06	0.31	0.26	0.23	0.28	0.88	0.4	0.3	0.71	0.8	0.54	0.9	0.65	0.87	0.68	0.86	0.48	0.88	0.29	0.8	0.52	0.23	0.01	0.02	0.03	0.05	0.04	0.34	0.79	0.17	0.09
6579	M	Wt	TREATED	1	2014-06-06	38160	120.48	Ch 15	0.06	0.74	0.34	0.92	0.38	0.56	0.59	0.43	0.06	0.15	0.1	0.38	0.09	0.1	0.39	0.07	0.11	0.78	0.46	0.52	0.79	0.75	0.86	0.81	0.6	0.91	0.47	0.86	0.39	0.94	0.62	0.28	0.19	0.13	0.03	0.03	0.06	0.04	0.12	0.54	0.09
6580	M	Wt	TREATED	1	2014-06-06	38160	120.48	Ch 16	0.02	0.56	0.53	0.76	0.71	0.58	0.87	0.44	0.04	0.03	0.06	0.21	0.43	0.13	0.05	0.84	0.16	0.48	0.49	0.68	0.9	0.47	0.92	0.82	0.9	0.43	0.64	0.85	0.6	0.56	0.58	0.43	0.05	0.24	0.28	0.07	0.03	0.04	0.05	0.05	0.36
6364	M	Wt	TREATED	1	2014-06-06	38160	120.48	Ch 9	0	0.01	0.24	0.69	0.53	0.4	0.81	0.47	0.01	0.03	0.35	0.44	0.5	0.67	0.49	0.26	0.22	0.76	0.46	0.84	0.51	0.76	0.64	0.78	0.72	0.72	0.67	0.78	0.28	0.64	0.54	0.3	0.01	0.02	0	0.01	0.01	0.73	0.65	0.17	0.73
6365	M	Wt	TREATED	1	2014-06-06	38160	120.48	Ch 10	0	0.02	0.18	0.68	0.63	0.38	0.83	0.63	0.03	0.03	0.06	0.04	0.09	0.91	0.4	0.07	0.06	0.59	0.51	0.79	0.96	0.65	0.87	0.83	0.55	0.86	0.76	0.49	0.72	0.03	0.38	0.38	0.04	0.03	0.05	0.05	0.07	0.05	0.39	0.61	0.61
6366	M	Ob	TREATED	1	2014-06-06	38160	120.48	Ch 11	0	0.01	0.33	0.7	0.9	0.67	0.67	0.62	0.11	0.02	0.04	0.06	0.04	0.71	0.93	0.13	0.04	0.72	0.42	0.56	0.7	0.82	0.88	0.79	0.62	0.74	0.72	0.63	0.7	0.67	0.6	0.31	0.02	0.01	0.01	0.03	0.02	0.42	0.63	0.03	0.32
6367	M	Wt	TREATED	1	2014-06-06	38160	120.48	Ch 12	0.02	0.05	0.28	0.59	0.35	0.88	0.51	0.36	0.05	0.04	0.32	0.07	0.37	0.91	0.26	0.7	0.11	0.38	0.56	0.3	0.64	0.74	0.93	0.9	0.87	0.49	0.94	0.5	0.91	0.3	0.7	0.4	0.02	0.01	0.01	0.27	0.38	0.39	0.77	0.12	0.04
6578	F	Wt	TREATED	1	2014-06-06	38160	120.48	Ch 3	0.01	0.06	0.05	0.07	0.81	0.95	0.7	0.53	0.12	0.19	0.14	0.14	0.29	0.93	0.33	0.26	0.46	0.9	0.23	0.91	0.54	0.05	0.6	0.96	0.64	0.85	0.71	0.9	0.69	0.54	0.84	0.41	0.02	0.04	0.46	0.04	0.03	0.01	0.04	0.51	0.78
6363	F	Wt	TREATED	1	2014-06-06	38160	120.48	Ch 2	0.04	0.05	0.19	0.68	0.43	0.83	0.58	0.51	0.07	0.13	0.48	0.06	0.07	0.3	0.9	0.38	0.2	0.77	0.64	0.68	0.04	0.6	0.89	0.94	0.61	0.9	0.4	0.89	0.59	0.83	0.56	0.42	0.03	0.09	0.2	0.03	0.06	0.03	0.06	0.62	0.55
6362	F	Wt	TREATED	1	2014-06-06	38160	120.48	Ch 1	0.03	0.05	0.2	0.86	0.1	0.86	0.3	0.08	0.3	0.77	0.13	0.07	0.15	0.78	0.73	0.61	0.56	0.9	0.63	0.9	0.91	0.57	0.9	0.75	0.69	0.85	0.13	0.14	0.9	0.45	0.76	0.29	0.08	0.07	0.06	0.08	0.04	0.36	0.69	0.75	0.15
6726	M	Wt	CONTROL	1	2014-06-13	36945	120.94	Ch 8	0.01	0.15	0.9	0.84	0.23	0.57	0.9	0.28	0.02	0.48	0.2	0.06	0.04	0.08	0.69	0.77	0.06	0.06	0.77	0.13	0.53	0.86	0.45	0.88	0.43	0.8	0.86	0.87	0.05	0.73	0.61	0.47	0.03	0.23	0.16	0.01	0.02	0.01	0.2	0.55	0.51
6727	M	Wt	CONTROL	1	2014-06-13	36945	120.94	Ch 9	0.16	0.79	0.81	0.52	0.88	0.04	0.38	0.63	0.03	0.01	0.01	0.01	0.13	0.57	0.02	0.02	0.02	0.57	0.31	0.57	0.37	0.79	0.77	0.71	0.9	0.63	0.9	0.26	0.68	0.87	0.26	0.46	0.02	0	0.01	0	0	0.06	0.03	0.12	0.85
6690	F	Ob	CONTROL	1	2014-06-13	36945	120.94	Ch 1	0.66	0.79	0.05	0.75	0.88	0.73	0.34	0.52	0.46	0.2	0.43	0.09	0.03	0.12	0.93	0.22	0.37	0.03	0.04	0.1	0.79	0.87	0.78	0.6	0.89	0.87	0.15	0.88	0.81	0.82	0.03	0.8	0.01	0.62	0.19	0.01	0.01	0.47	0.86	0.28	0.07
6691	F	Ob	CONTROL	0.84	2014-06-13	36945	120.94	Ch 2	0.74	0.22	0.57	0.86	0.65	0.64	0.17	0.62	0.09	0.48	0.04	0.03	0.01	0.04	0.06	0.59	0.25	0.04	0.04	0.09	0.75	0.43	0.9	0.84	0.35	0.83	0.44	0.7	0.06	0.76	0.59	0.28	0.18	0.32	0.1	0.02	0.04	0.03	0.21	0.7	0.01
6693	F	Wt	CONTROL	1	2014-06-13	36945	120.94	Ch 3	0.01	0.05	0.6	0.7	0.42	0.77	0.59	0.44	0.02	0.44	0.03	0.32	0.04	0.35	0.77	0.24	0.01	0.11	0.41	0.45	0.71	0.53	0.85	0.6	0.76	0.6	0.85	0.44	0.84	0.41	0.79	0.33	0.03	0.19	0.03	0.02	0.01	0.02	0.04	0.01	0.39
6694	F	Wt	CONTROL	1	2014-06-13	36945	120.94	Ch 4	0.04	0.04	0.06	0.91	0.03	0.42	0.89	0.73	0.02	0.84	0.7	0.1	0.46	0.93	0.47	0.08	0.09	0.06	0.92	0.69	0.03	0.19	0.89	0.35	0.92	0.62	0.79	0.55	0.89	0.39	0.61	0.5	0.02	0.03	0.02	0.03	0.01	0.01	0.03	0.03	0.07
6695	F	Ob	CONTROL	0.68	2014-06-13	36945	120.94	Ch 5	0.77	0.18	0.83	0.39	0.21	0.83	0.34	0.62	0.03	0.11	0.14	0.02	0.01	0.03	0.77	0.55	0.02	0.02	0.01	0.66	0.86	0.21	0.89	0.76	0.71	0.86	0.78	0.1	0.31	0.88	0.48	0.33	0.03	0.31	0.02	0.02	0.23	0.52	0.03	0.01	0.03
6696	F	Wt	CONTROL	1	2014-06-13	36945	120.94	Ch 6	0	0.06	0.72	0.27	0.74	0.55	0.72	0.39	0.01	0.02	0.03	0.39	0.02	0.05	0.79	0.73	0.13	0.43	0.06	0.02	0.59	0.72	0.58	0.59	0.84	0.47	0.91	0.22	0.66	0.88	0.2	0.48	0.02	0	0	0.01	0	0.01	0.26	0.32	0.26
6700	F	Wt	CONTROL	1	2014-06-13	36945	120.94	Ch 7	0.02	0.02	0.05	0.62	0.08	0.9	0.69	0.48	0	0.02	0.04	0.02	0.02	0.12	0.84	0.81	0.14	0.61	0.5	0.34	0.19	0.58	0.88	0.86	0.56	0.84	0.72	0.58	0.91	0.59	0.77	0.39	0.04	0.19	0.06	0.03	0.01	0.03	0.02	0.35	0.01
6736	F	Wt	CONTROL	1	2014-06-13	36945	120.94	Ch 13	0.02	0.05	0.84	0.86	0.6	0.85	0.55	0.42	0.17	0.13	0.14	0.57	0.14	0.05	0.06	0.6	0.89	0.39	0.43	0.07	0.01	0.02	0.7	0.88	0.73	0.49	0.91	0.63	0.87	0.44	0.86	0.28	0.04	0.42	0.02	0.21	0.03	0.03	0.02	0.06	0.85
6724	F	Ob	CONTROL	0.78	2014-06-13	36945	120.94	Ch 11	0.53	0.78	0.08	0.76	0.91	0.65	0.37	0.48	0.19	0.02	0.03	0.04	0.05	0.03	0.75	0.68	0.22	0.05	0.04	0.01	0.42	0.91	0.82	0.9	0.46	0.93	0.47	0.11	0.26	0.9	0.6	0.3	0.01	0.18	0.33	0.02	0.02	0.05	0.67	0.73	0.01
6725	F	Wt	CONTROL	1	2014-06-13	36945	120.94	Ch 12	0.02	0.06	0.29	0.95	0.93	0.53	0.1	0.63	0.05	0.05	0.07	0.12	0.91	0.65	0.15	0.11	0.05	0.17	0.48	0.5	0.75	0.75	0.8	0.12	0.94	0.93	0.84	0.22	0.92	0.81	0.74	0.06	0.03	0.02	0.03	0.46	0.12	0.48	0.86	0.17	0.25
6698	F	Wt	CONTROL	1	2014-06-13	36945	120.94	Ch 10	0.04	0.52	0.77	0.54	0.73	0.17	0.45	0.61	0.01	0.02	0.05	0.02	0.04	0.03	0.18	0.26	0.27	0.56	0.04	0.11	0.56	0.43	0.7	0.6	0.84	0.87	0.29	0.78	0.84	0.23	0.25	0.64	0.01	0	0	0.01	0	0.44	0.52	0.5	0.28
6738	M	Wt	CONTROL	0.95	2014-06-20	35877	120.77	Ch 1	0.15	0.73	0.73	0.86	0.69	0.78	0.87	0.8	0.38	0.55	0.19	0.46	0.21	0.53	0.6	0.13	0.12	0.1	0.54	0.63	0.13	0.03	0.46	0.94	0.78	0.91	0.64	0.9	0.89	0.56	0.81	0.7	0.36	0.17	0.55	0.22	0.38	0.36	0.36	0.3	0.49
6739	M	Wt	CONTROL	1	2014-06-20	35877	120.77	Ch 2	0.05	0.74	0.53	0.91	0.84	0.53	0.92	0.75	0.05	0.03	0.22	0.06	0.09	0.62	0.06	0.36	0.02	0.01	0.02	0.83	0.54	0.47	0.75	0.78	0.24	0.83	0.72	0.66	0.86	0.38	0.67	0.47	0.14	0.05	0.34	0.02	0.19	0.44	0.1	0.19	0.04
6740	F	Ob	TREATED	1	2014-06-20	35877	120.77	Ch 3	0.26	0.81	0.42	0.53	0.6	0.17	0.9	0.5	0.19	0.06	0.05	0.04	0.16	0.91	0.15	0.06	0.04	0.08	0.9	0.84	0.86	0.72	0.87	0.85	0.35	0.79	0.6	0.45	0.5	0.21	0.93	0.59	0.17	0.31	0.03	0.43	0.26	0.01	0.04	0.05	0.3
6741	F	Wt	TREATED	1	2014-06-20	35877	120.77	Ch 4	0.02	0.05	0.84	0.48	0.88	0.33	0.71	0.78	0.06	0.31	0.18	0.68	0.19	0.11	0.04	0.19	0.88	0.55	0.14	0.12	0.14	0.05	0.13	0.85	0.74	0.86	0.82	0.56	0.56	0.87	0.74	0.64	0.14	0.19	0.35	0.07	0.04	0.07	0.43	0.8	0.45
6742	F	Wt	TREATED	1	2014-06-20	35877	120.77	Ch 5	0.03	0.04	0.61	0.89	0.56	0.44	0.81	0.64	0.11	0.29	0.28	0.54	0.16	0.34	0.9	0.2	0.53	0.32	0.08	0.09	0.07	0.18	0.94	0.8	0.81	0.79	0.84	0.73	0.43	0.86	0.82	0.36	0.03	0.22	0.02	0.54	0.06	0.35	0.46	0.02	0.01
6743	M	Ob	TREATED	1	2014-06-20	35877	120.77	Ch 6	0.31	0.53	0.58	0.42	0.38	0.4	0.49	0.41	0.06	0.07	0.05	0.54	0.03	0.63	0.08	0.17	0.5	0.03	0.08	0.27	0.51	0.55	0.89	0.68	0.36	0.84	0.8	0.39	0.09	0.89	0.46	0.42	0.11	0.08	0.01	0.02	0.14	0.83	0.3	0.01	0.01
6744	M	Wt	TREATED	1	2014-06-20	35877	120.77	Ch 7	0.03	0.04	0.82	0.89	0.64	0.74	0.67	0.65	0.03	0.31	0.03	0.51	0.15	0.04	0.82	0.49	0.03	0.03	0.78	0.62	0.79	0.43	0.87	0.83	0.61	0.87	0.79	0.62	0.88	0.32	0.85	0.24	0.1	0.35	0.21	0.01	0.01	0.26	0.67	0	0.01
[truncated: 110 more columns]

## Sheet: Stats
Summary of Comparions
Sleep Phenotype	Model	F stat, p-value
Day 1	Genotype Effect	F(1,119) = 20.1988 p < 0.0001
Night 1	Genotype x Treatment Effect	F(3,117) = 14.5739 p <0.0001
	Contrast Db Treated differs from the 3 others	F(1,117) = 37.5967 p< 0.0001
Day 2	Genotype Effect	F(1,119) = 14.2936, p = 0.0002
Night 2	Genotype x Treatment Effect	F(3,117) = 15.9841 , p < 0.0001
	Contrast Db Treated differs from the 3 others	F(1,117) = 38.6975 p <0.0001
Day 3	Genotype Effect	F(1, 119) = 23.661, p < 0.0001
Night 3	Genotype x Treatment Effect	F(3,117) = 17.0269 p <0.0001
	Contrast Db Treated differs from the 3 others	F(1,117) = 33.9767, p < 0.0001
Day 4	n.s.
Night 4	Genotype x Treatment Effect	F(3,117) = 17.0269 p < 0.0001
	Contrast Db Treated differs from the 3 others	F(1,117)=33.9767 p < 0.0001
Day 5	Genotype Effect	F(1,119)= 19.9947 p <0.0001
Night 5	Genotype x Treatment Effect	F(1,119) = 53.2411 P<0.0001
Avg All Day	Genotype Effect	F(1,119) = 11.9020 p=0.0008
Avg All Night	Genotype x Treatment Effect	F(3,117) = 18.6027 p < 0.0001
	Contrast Db Treated differs from the 3 others	F(1,117)= 43.8034, p < 0.0001
Avg 24 Hour	n.s.
Sleep Bout Lengths	n.s
Light Sleep Bout Length	Genotype	F(1,119)=19.173, p <0.0001
Dark Sleep Bout Lengths	n.s.
Activity Onset wrt Dark Onset	Genotype Effect	F(1,119)=6..3801, p= 0.0129
Peak Wake with respect to Dark Onset	Genotype Effect	F(1,119)=6.9002, p=0.0098
